# Supplementary material for: Abdominal obesity prevalence in Latin America: a systematic review and meta-analysis comparing ATP III and IDF criteria
Source: Frontiers journal article supplement (doi:10.3389/fendo.2025.1562060), 2025-06-17
Supplement: Data_Sheet_5.pdf [file Data_Sheet_5.pdf]

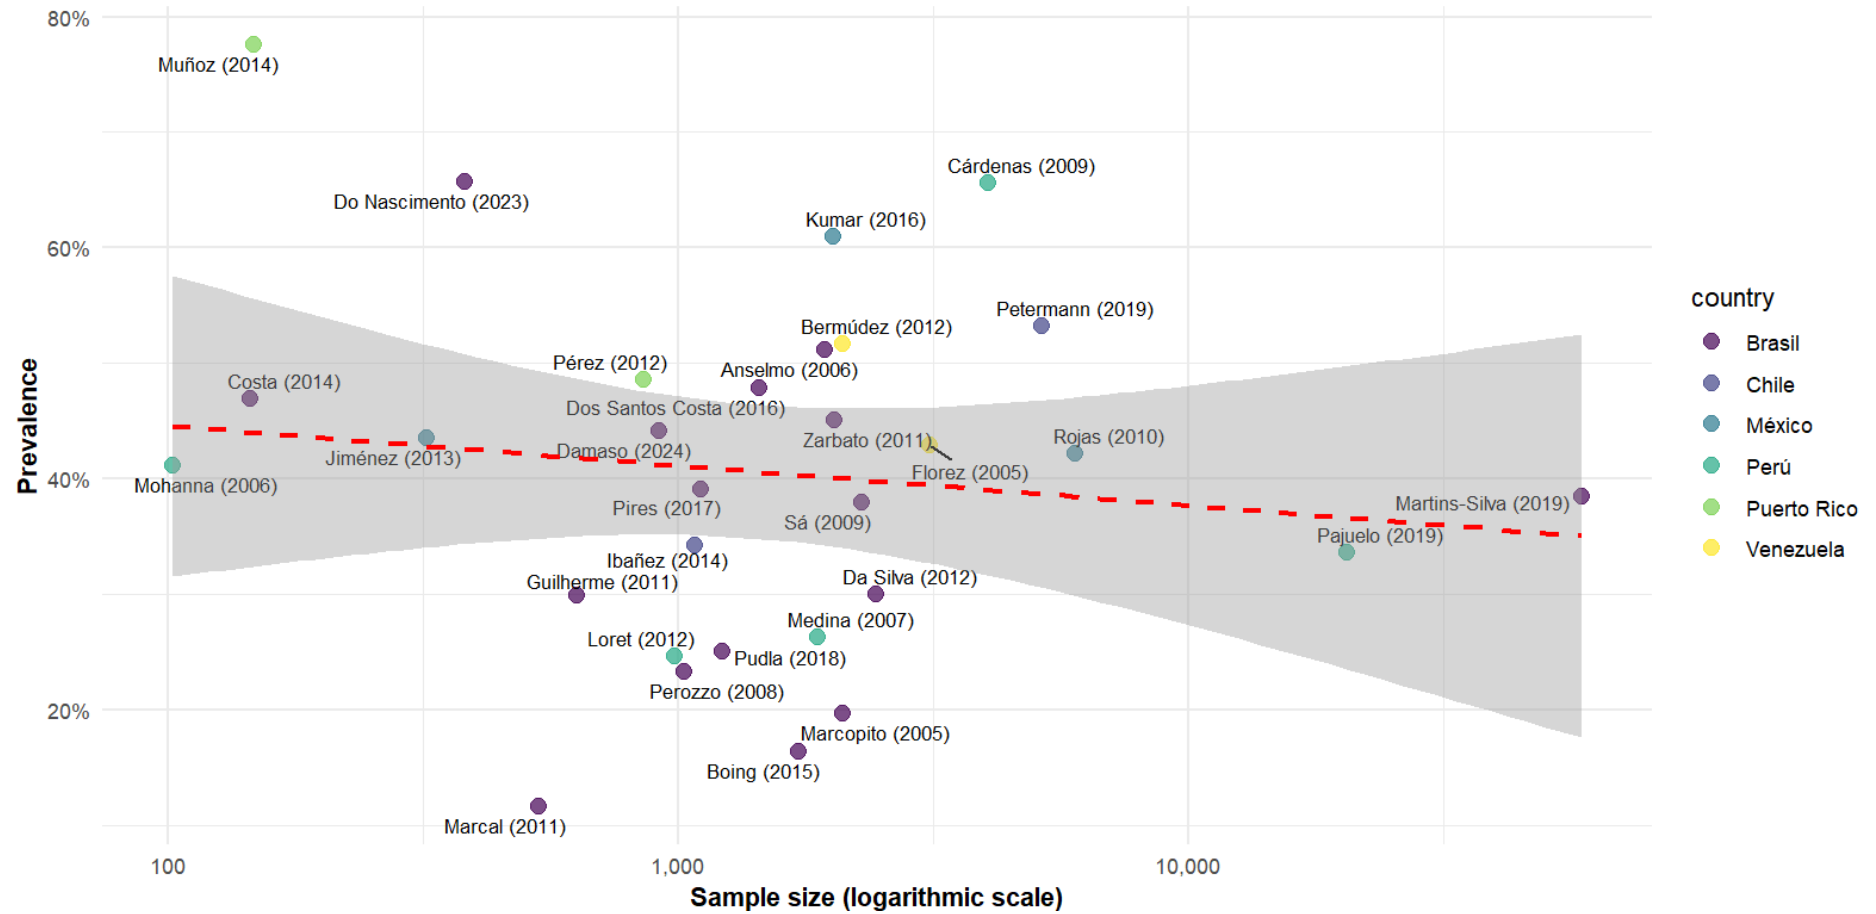

Supplementary material 5. Meta-regression of the prevalence of OA – ATP by year of sample size in Latin American countries
